# Supplementary material for: The Disordered C-Terminus of the Chaperone DnaK Increases the Competitive Fitness of Pseudomonas putida and Facilitates the Toxicity of GraT
Source: MDPI journal article supplement (doi:10.3390/microorganisms9020375), 2021-02-13
Supplement: s1 [file s1]

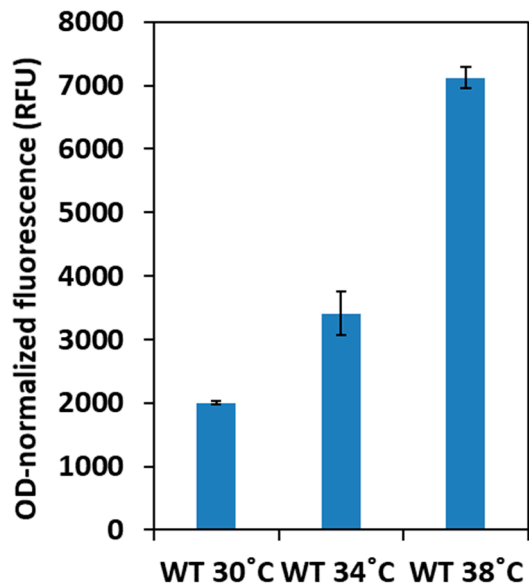

**Figure S1.** Heat shock response of *P. putida* measured as fluorescence of CFP (cyan fluorescent protein) expressed from the  $\sigma^{32}$ -dependent *Pibpfxs* promoter. *P. putida* harbouring the reporter plasmid pAG032 was grown at 30 °C in glucose minimal medium until  $OD_{600} \sim 0.5$ . Then, some cultures were shifted to either 34 °C or 38 °C and after 2 hours of the temperature shift the  $OD_{600}$  and fluorescence (excitation 433 nm, emission 475 nm) values were measured. The  $OD_{600}$ -normalized fluorescence values (RFU) from three independent biological replicates (average and standard deviation) is presented.

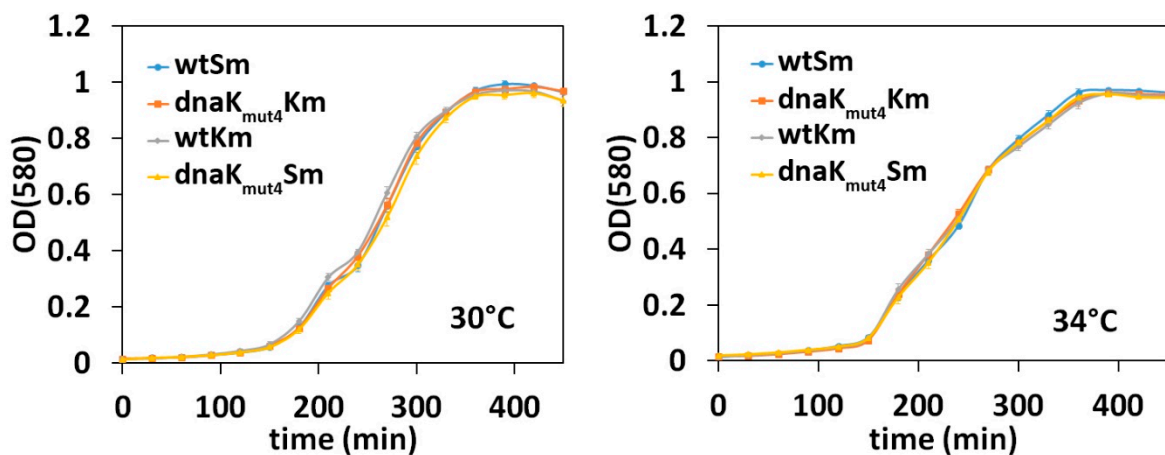

**Figure S2.** Growth curves of *P. putida* wild-type and *dnaK<sub>mut4</sub>* strains possessing streptomycin (wtSm and *dnaK<sub>mut4</sub>*Sm) or kanamycin (wtKm and *dnaK<sub>mut4</sub>*SKm) resistance genes in their chromosome. Bacteria were grown on microtiter plates in LB medium at 30 °C and 34 °C. The results are the average of at least 10 replicates and error bars represent the standard deviation.
